# Supplementary material for: RasG signaling is important for optimal folate chemotaxis in Dictyostelium
Source: PubMed Central journal article supplement (PMC4021067; doi:10.1186/1471-2121-15-13), 2014-04-17

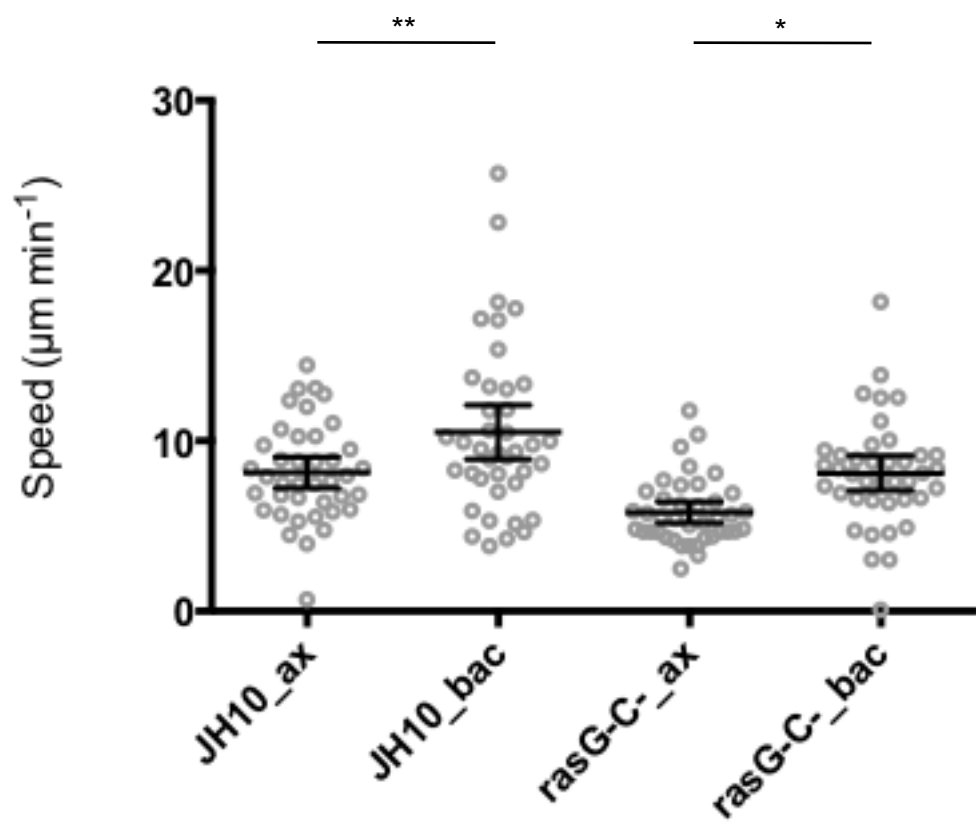

Supplement: 1471-2121-15-13-S1.pdf [file 1471-2121-15-13-S1.pdf]
